# Supplementary material
Source: publisher figshare collection journal article supplement (https://tandf.figshare.com/ndownloader/files/21975498)
Supplement: Supplementary file 1 [file 21975498]

# Supplemental materials

**Table E1** Mean t-scores for SCL-90-R subscales from baseline to 12-month follow-up, stratified by the development of substance use.

|  | Stable abstinence (N = 32) | | | |  | Unstable abstinence (N = 32) | | | |  | Relapse (N = 77) | | | |
| --- | --- | --- | --- | --- | --- | --- | --- | --- | --- | --- | --- | --- | --- | --- |
|  | Baseline (N = 33) | 3 months (N = 29) | 6 months (N = 29) | 12 months (N = 33) |  | Baseline (N = 31) | 3 months (N = 30) | 6 months (N = 24) | 12 months (N = 31) |  | Baseline (N = 77) | 3 months (N = 68) | 6 months (N = 58) | 12 months (N = 77) |
| SOM | 0.8 (0.8) | 0.4 (0.4) | 0.4 (0.5) | 0.4 (0.4) |  | 1 (0.7) | 0.8 (0.8) | 0.5 (0.6) | 0.5 (0.4) |  | 1.1 (0.7) | 0.9 (0.7) | 0.6 (0.7) | 1.1 (0.8) |
| O-C | 1.3 (0.8) | 0.8 (0.5) | 0.8 (0.6) | 0.7 (0.5) |  | 1.7 (0.8) | 1.1 (0.8) | 1.0 (0.9) | 1.0 (0.7) |  | 1.6 (0.7) | 1.4 (0.8) | 1.1 (0.9) | 1.5 (0.8) |
| INS | 1.1 (0.9) | 0.6 (0.6) | 0.6 (0.7) | 0.5 (0.4) |  | 1.3 (1) | 0.8 (0.9) | 0.7 (0.7) | 0.7 (0.7) |  | 1.3 (0.7) | 1.1 (0.8) | 0.9 (0.8) | 1.2 (0.8) |
| DEP | 1.0 (0.8) | 0.5 (0.5) | 0.5 (0.5) | 0.5 (0.5) |  | 1.4 (0.8) | 0.9 (0.7) | 0.8 (0.8) | 0.8 (0.6) |  | 1.5 (0.7) | 1.3 (0.8) | 1 (0.8) | 1.3 (0.9) |
| ANX | 1.1 (0.9) | 0.4 (0.3) | 0.5 (0.6) | 0.4 (0.4) |  | 1.3 (0.9) | 0.8 (0.8) | 0.7 (0.9) | 0.7 (0.6) |  | 1.4 (0.8) | 1.2 (0.9) | 0.8 (0.9) | 1.3 (0.8) |
| HOS | 0.7 (0.9) | 0.3 (0.4) | 0.3 (0.5) | 0.2 (0.3) |  | 0.8 (0.9) | 0.4 (0.7) | 0.4 (0.8) | 0.4 (0.6) |  | 0.9 (0.7) | 0.7 (0.7) | 0.6 (0.7) | 0.8 (0.9) |
| PHO | 0.7 (0.7) | 0.3 (0.4) | 0.4 (0.6) | 0.2 (0.3) |  | 0.9 (0.9) | 0.5 (0.6) | 0.6 (0.9) | 0.5 (0.6) |  | 1.1 (0.9) | 0.9 (0.9) | 0.7 (0.9) | 0.9 (0.8) |
| PAR | 0.9 (0.9) | 0.4 (0.5) | 0.4 (0.5) | 0.3 (0.4) |  | 1.1 (0.9) | 0.6 (0.6) | 0.6 (0.8) | 0.6 (0.6) |  | 1.3 (0.9) | 1 (0.9) | 0.8 (0.8) | 1.1 (0.9) |
| PSY | 0.5 (0.6) | 0.1 (0.2) | 0.2 (0.4) | 0.2 (0.3) |  | 0.8 (0.8) | 0.4 (0.4) | 0.3 (0.4) | 0.3 (0.4) |  | 0.7 (0.6) | 0.6 (0.7) | 0.4 (0.6) | 0.6 (0.5) |
| ADD | 1.1 (0.7) | 0.6 (0.4) | 0.6 (0.5) | 0.6 (0.4) |  | 1.5 (0.9) | 0.9 (0.7) | 0.9 (0.9) | 0.8 (0.6) |  | 1.5 (0.8) | 1.3 (0.7) | 1.0 (0.8) | 1.4 (0.8) |

All data are mean (SD). Abbreviations: SOM = Somatization subscale; O-C = Obsessive–compulsive subscale; INS = Interpersonal sensitivity subscale; DEP = Depression subscale; ANX = Anxiety subscale; HOS = Hostility subscale; PHO = Phobic anxiety subscale; PAR = Paranoia subscale; PSY = Psychoticism subscale; ADD = Additional symptoms subscale.
